# Supplementary material
Source: HighWire-hosted journal article supplement (http://rc.rcjournal.com/highwire/filestream/22440/field_highwire_adjunct_files/1/rc-09627-File005.docx)
Supplement: rc-09627-File005.docx [file rc-09627-File005.docx]

**Supplement 2** – Forest plots of all quantitative syntheses.

**Figure S2.1 –** Forest plot comparing community-based PR and control interventions for the 6-minute walking distance. A positive SMD indicates superior improvement for the community-based PR group.

**Figure S2.2 –** Forest plot comparing community-based PR and control interventions for the Saint George’s respiratory questionnaire (SGRQ) total score. A negative SMD indicates superior improvement for the community-based PR group.

**Figure S2.3 –** Forest plot comparing community-based PR and control interventions for the Saint George’s respiratory questionnaire (SGRQ) Symptoms subscore. A negative SMD indicates superior improvement for the community-based PR group.

**Figure S2.4 –** Forest plot comparing community-based PR and control interventions for the Saint George’s respiratory questionnaire (SGRQ) Activity subscore. A negative SMD indicates superior improvement for the community-based PR group.

**Figure S2.5 –** Forest plot comparing community-based PR and control interventions for the Saint George’s respiratory questionnaire (SGRQ) Impacts subscore. A negative SMD indicates superior improvement for the community-based PR group.

**Figure S2.6 –** Forest plot comparing community-based PR and control interventions for the Chronic respiratory disease questionnaire (CRQ) Dyspnoea subscore. A positive SMD indicates superior improvement for the community-based PR group.

**Figure S2.7 –** Forest plot comparing community-based PR and control interventions for the Chronic respiratory disease questionnaire (CRQ) Fatigue subscore. A positive SMD indicates superior improvement for the community-based PR group.

**Figure S2.8 –** Forest plot comparing community-based PR and control interventions for the Chronic respiratory disease questionnaire (CRQ) Emotional subscore. A positive SMD indicates superior improvement for the community-based PR group.

**Figure S2.9 –** Forest plot comparing community-based PR and control interventions for the Chronic respiratory disease questionnaire (CRQ) Mastery subscore. A positive SMD indicates superior improvement for the community-based PR group.

**Figure S2.10 –** Forest plot comparing community-based PR and control interventions for the modified Medical Research Council (mMRC) Dyspnoea scale. A negative SMD indicates superior improvement for the community-based PR group.

**Figure S2.11 –** Forest plot comparing community-based PR and control interventions for the FEV1% (forced expiratory volume in 1 s, percentage of the predicted value). A positive SMD indicates superior improvement for the community-based PR group.
